# Supplementary material for: Nested Markov chain hyper-heuristic (NMHH): a hybrid hyper-heuristic framework for single-objective continuous problems
Source: PeerJ journal article supplement (doi:10.7717/peerj-cs.1785), 2024-02-02
Supplement: TableS1.pdf [file TableS1.pdf]

**Table S1.** Results of parameter tuning on the Rosenbrock function in 50, 100 and 500 dimensions

| Dim. | Function eval. | Min median + IQR    | SA steps | SA temp      | SA alpha |
|------|----------------|---------------------|----------|--------------|----------|
| 50   | 100            | 5.698500e+01        | 50       | 1000         | 5.0      |
| 50   | 100            | 4.583468e+01        | 100      | 1000         | 5.0      |
| 50   | 100            | 4.569869e+01        | 200      | 1000         | 5.0      |
| 50   | 100            | 4.661390e+01        | 50       | 10000        | 5.0      |
| 50   | 100            | 4.550024e+01        | 100      | 10000        | 5.0      |
| 50   | 100            | 4.650158e+01        | 200      | 10000        | 5.0      |
| 50   | 100            | 4.615916e+01        | 50       | 1000         | 50.0     |
| 50   | 100            | <b>4.537342e+01</b> | 100      | <b>1000</b>  | 50.0     |
| 50   | 100            | 4.552422e+01        | 200      | 1000         | 50.0     |
| 50   | 100            | 2.678746e+03        | 50       | 10000        | 50.0     |
| 50   | 100            | 4.619361e+01        | 100      | 10000        | 50.0     |
| 50   | 100            | 4.576032e+01        | 200      | 10000        | 50.0     |
| 50   | 5000           | 4.427826e-11        | 50       | 1000         | 5.0      |
| 50   | 5000           | 3.689173e-21        | 100      | 1000         | 5.0      |
| 50   | 5000           | <b>0.000000e+00</b> | 200      | <b>1000</b>  | 5.0      |
| 50   | 5000           | 8.668238e-13        | 50       | 10000        | 5.0      |
| 50   | 5000           | <b>0.000000e+00</b> | 100      | <b>10000</b> | 5.0      |
| 50   | 5000           | <b>0.000000e+00</b> | 200      | <b>10000</b> | 5.0      |
| 50   | 5000           | 6.781357e-11        | 50       | 1000         | 50.0     |
| 50   | 5000           | 1.672572e-11        | 100      | 1000         | 50.0     |
| 50   | 5000           | 1.236658e-14        | 200      | 1000         | 50.0     |
| 50   | 5000           | <b>0.000000e+00</b> | 50       | <b>10000</b> | 50.0     |
| 50   | 5000           | 4.509591e-12        | 100      | 10000        | 50.0     |
| 50   | 5000           | <b>0.000000e+00</b> | 200      | <b>10000</b> | 50.0     |
| 100  | 100            | 8.574862e+03        | 50       | 1000         | 5.0      |
| 100  | 100            | 9.588105e+01        | 100      | 1000         | 5.0      |
| 100  | 100            | 1.518986e+03        | 200      | 1000         | 5.0      |
| 100  | 100            | 9.573063e+01        | 50       | 10000        | 5.0      |
| 100  | 100            | 9.594477e+01        | 100      | 10000        | 5.0      |
| 100  | 100            | <b>9.466789e+01</b> | 200      | <b>10000</b> | 5.0      |
| 100  | 100            | 9.591726e+01        | 50       | 1000         | 50.0     |
| 100  | 100            | 9.530534e+01        | 100      | 1000         | 50.0     |
| 100  | 100            | 9.494694e+01        | 200      | 1000         | 50.0     |
| 100  | 100            | 9.697318e+01        | 50       | 10000        | 50.0     |
| 100  | 100            | 9.620821e+01        | 100      | 10000        | 50.0     |
| 100  | 100            | 9.535291e+01        | 200      | 10000        | 50.0     |
| 100  | 5000           | 3.483557e+01        | 50       | 1000         | 5.0      |
| 100  | 5000           | 5.461610e+00        | 100      | 1000         | 5.0      |
| 100  | 5000           | 3.384631e+01        | 200      | 1000         | 5.0      |
| 100  | 5000           | 3.830000e+01        | 50       | 10000        | 5.0      |
| 100  | 5000           | 3.292423e+01        | 100      | 10000        | 5.0      |
| 100  | 5000           | 3.310204e+01        | 200      | 10000        | 5.0      |
| 100  | 5000           | 3.343096e+01        | 50       | 1000         | 50.0     |
| 100  | 5000           | 3.317775e+01        | 100      | 1000         | 50.0     |
| 100  | 5000           | 3.394381e+01        | 200      | 1000         | 50.0     |
| 100  | 5000           | 3.434196e+01        | 50       | 10000        | 50.0     |
| 100  | 5000           | 3.112265e+01        | 100      | 10000        | 50.0     |
| 100  | 5000           | <b>0.000000e+00</b> | 200      | <b>10000</b> | 50.0     |
| 500  | 100            | 4.917224e+02        | 50       | 1000         | 5.0      |
| 500  | 100            | 5.901930e+04        | 100      | 1000         | 5.0      |
| 500  | 100            | 4.916484e+02        | 200      | 1000         | 5.0      |
| 500  | 100            | 4.935340e+02        | 50       | 10000        | 5.0      |
| 500  | 100            | <b>4.909480e+02</b> | 100      | <b>10000</b> | 5.0      |
| 500  | 100            | 4.917368e+02        | 200      | 10000        | 5.0      |
| 500  | 100            | 4.932843e+02        | 50       | 1000         | 50.0     |
| 500  | 100            | 5.160497e+04        | 100      | 1000         | 50.0     |
| 500  | 100            | 4.916740e+02        | 200      | 1000         | 50.0     |
| 500  | 100            | 3.128190e+04        | 50       | 10000        | 50.0     |
| 500  | 100            | 4.928036e+02        | 100      | 10000        | 50.0     |
| 500  | 100            | 4.917936e+02        | 200      | 10000        | 50.0     |
| 500  | 5000           | 4.329341e+02        | 50       | 1000         | 5.0      |
| 500  | 5000           | <b>2.993221e+02</b> | 100      | <b>1000</b>  | 5.0      |
| 500  | 5000           | 4.307063e+02        | 200      | 1000         | 5.0      |
| 500  | 5000           | 4.321560e+02        | 50       | 10000        | 5.0      |
| 500  | 5000           | 4.332272e+02        | 100      | 10000        | 5.0      |
| 500  | 5000           | 3.924223e+02        | 200      | 10000        | 5.0      |
| 500  | 5000           | 4.307235e+02        | 50       | 1000         | 50.0     |
| 500  | 5000           | 4.333202e+02        | 100      | 1000         | 50.0     |
| 500  | 5000           | 4.291124e+02        | 200      | 1000         | 50.0     |
| 500  | 5000           | 4.353929e+02        | 50       | 10000        | 50.0     |
| 500  | 5000           | 4.334789e+02        | 100      | 10000        | 50.0     |
| 500  | 5000           | 3.079623e+02        | 200      | 10000        | 50.0     |
